# Supplementary material for: Divergent evolution toward sex chromosome-specific gene regulation in Drosophila
Source: PubMed Central journal article supplement — Genes Dev. 2021 Jul 1;35(13-14):1055–70. doi: 10.1101/gad.348411.121 (PMC8247607; doi:10.1101/gad.348411.121), 2021-07-01
Supplement: supp_gad.348411.121_Supplemental_Fig_S1.pdf [file supp_gad.348411.121_Supplemental_Fig_S1.pdf]

# Suppl. Fig. 1

A

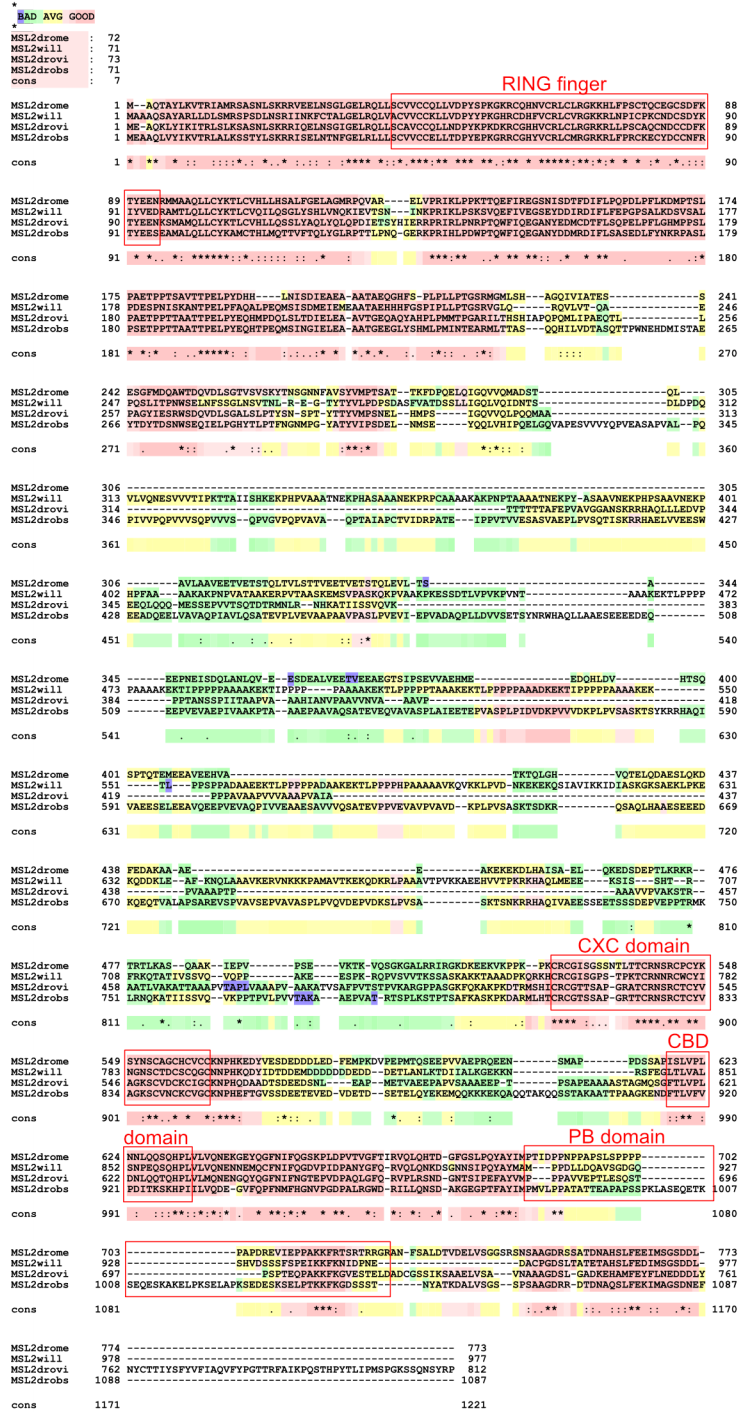

B

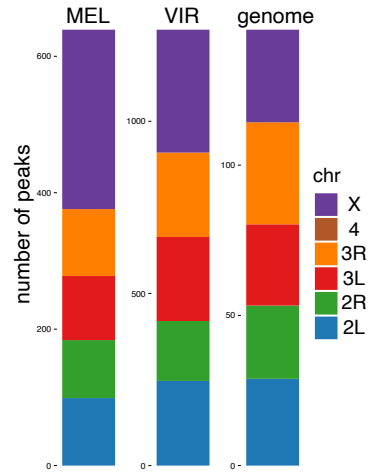

Figure S1. The MSL2 proteins.

- (A) Protein sequence alignment of *D. melanogaster* (drome), *D. willistoni* (will), *D. busckii* (drobs) and *D. virilis* (drovi) MSL2 proteins using the expresso t-coffee web server according to (Armougom et al. 2006). Red portions have a high reliability, blue and green portions are the less consistent. Relevant domains are highlighted.
- (B) Chromosomal distribution of *in vitro* binding events of MSL2<sup>mel</sup> (MEL) and MSL2<sup>vir</sup> (VIR) from one (MEL) and two (VIR) independent genome-wide DIP-assays using *virilis* genome. The chromosomal size distribution (genome) is provided for reference.
