# Supplementary material for: Divergent evolution toward sex chromosome-specific gene regulation in Drosophila
Source: PubMed Central journal article supplement — Genes Dev. 2021 Jul 1;35(13-14):1055–70. doi: 10.1101/gad.348411.121 (PMC8247607; doi:10.1101/gad.348411.121), 2021-07-01
Supplement: supp_gad.348411.121_Supplemental_Fig_S2_.pdf [file supp_gad.348411.121_Supplemental_Fig_S2_.pdf]

## Suppl. Fig. 2

A

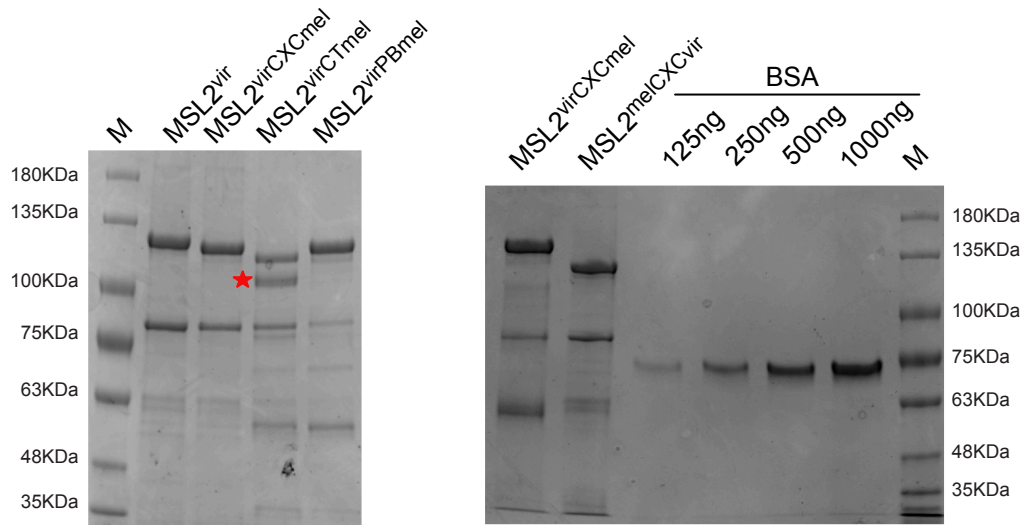

B

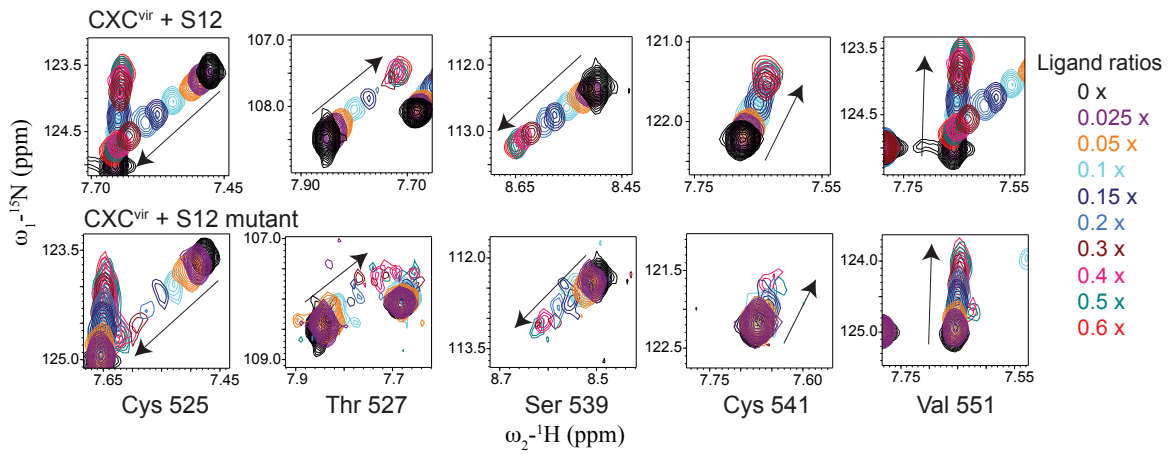

C

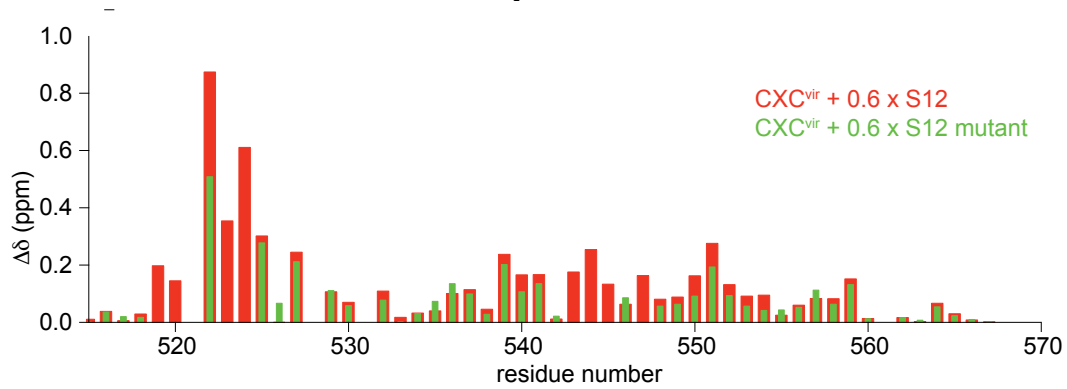

D

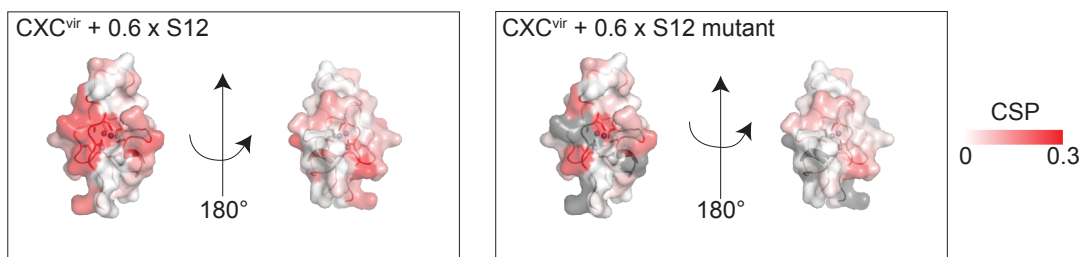

**Figure S2. Characterization of the DNA binding specificity of the CXC<sup>vir</sup> domain.**

- (A) Coomassie staining of proteins used in DIP assays. The MSL2<sup>virCT<sup>mel</sup></sup> runs as a double band due to a deletion at the N-terminus of the protein (star). Deletion at the N-terminus of MSL2 do not affect the DNA binding properties of the protein (Villa et al. 2016).
- (B) Fitted NMR titration curves for few of the residues are shown with calculated affinity. Errors represent standard error of the group fitting of all the residues showing CSPs above mean.
- (C) Residue wise chemical shift perturbation (CSP) plot upon titration with saturating concentrations of S12 (red) and S12 mutant (green) DNA in *D. virilis* CXC. Residue 526 in S12 DNA titration and residues 519, 520, 523, 524 and 543-545 during S12 mutant titration could not be tracked due to severe line broadening.
- (D) CSPs plotted on the homology model of *D. virilis* CXC domain showing that the S12 and S12 mutant DNA binding surface is similar. The homology model was made SWISS-MODEL web server using crystal structure of *D. melanogaster* MSL2 CXC domain as template (Schwede et al. 2003). Resides which showed severe line broadening are shown in grey.
