# Supplementary material for: Divergent evolution toward sex chromosome-specific gene regulation in Drosophila
Source: PubMed Central journal article supplement — Genes Dev. 2021 Jul 1;35(13-14):1055–70. doi: 10.1101/gad.348411.121 (PMC8247607; doi:10.1101/gad.348411.121), 2021-07-01
Supplement: supp_gad.348411.121_Supplemental_Fig_S3.pdf [file supp_gad.348411.121_Supplemental_Fig_S3.pdf]

## Suppl. Fig. 3

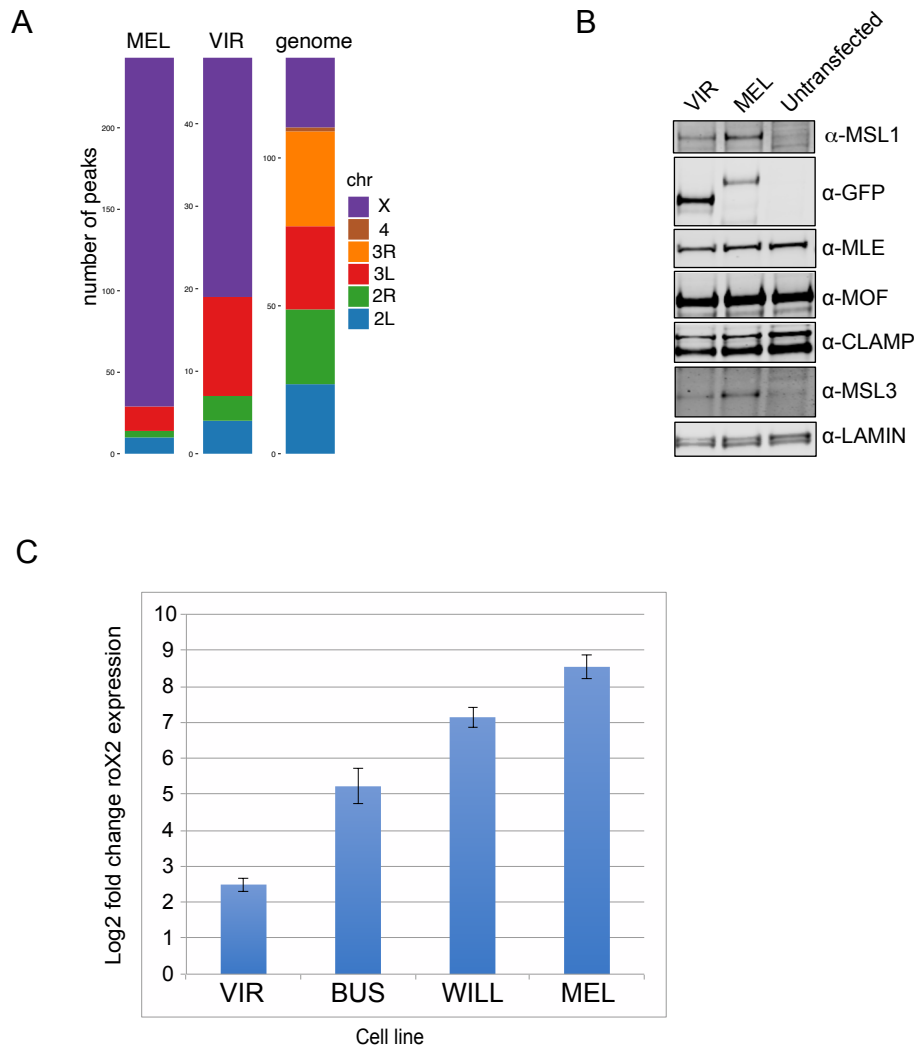

### Figure S3. MSL2<sup>vir</sup> expressed in female cells is a functional protein.

- (A) Chromosomal distribution of MSL3-ChIP peaks obtained by two independent experiments using female *D. melanogaster* cells transfected with the MSL2<sup>mel</sup> (MEL) or MSL2<sup>vir</sup> (VIR). The chromosomal size distribution (genome) is provided for reference. Only peaks common to all replicates are considered.
- (B) Western-blot analyses of whole cells extracts from *D. melanogaster* female cells expressing the indicated MSL2-GFP constructs. MSL2<sup>vir</sup> (VIR), MSL2<sup>mel</sup> (MEL).
- (C) RoX2 expression analysis of *D. melanogaster* female cells transfected with the indicated MSL2 constructs, MSL2<sup>vir</sup> (VIR), MSL2<sup>bus</sup> (BUS), MSL2<sup>will</sup> (WILL), MSL2<sup>mel</sup> (MEL). Levels of roX2 were analyzed by RT-qPCR, normalized to levels of 7SK and expressed as Log2 fold change over the control (untransfected cells). Data are mean  $\pm$  SEM of three biological replicates.
