# Supplementary material for: Divergent evolution toward sex chromosome-specific gene regulation in Drosophila
Source: PubMed Central journal article supplement — Genes Dev. 2021 Jul 1;35(13-14):1055–70. doi: 10.1101/gad.348411.121 (PMC8247607; doi:10.1101/gad.348411.121), 2021-07-01
Supplement: supp_gad.348411.121_Supplemental_Fig_S5.pdf [file supp_gad.348411.121_Supplemental_Fig_S5.pdf]

## Suppl. 5

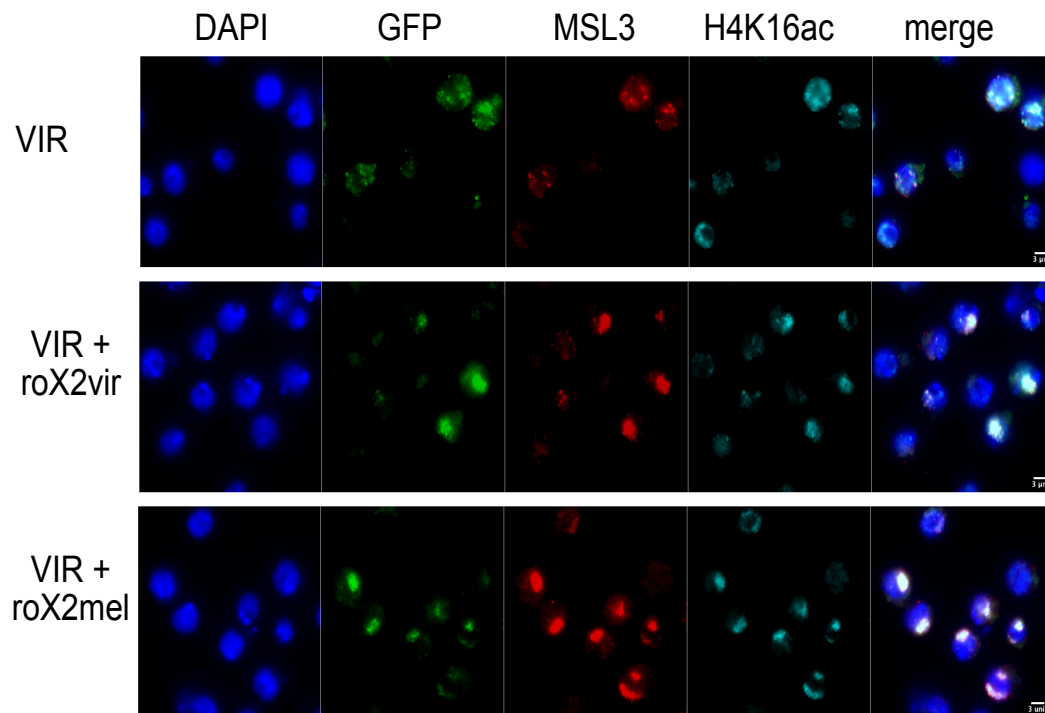

**Figure S5. MSL2<sup>vir</sup> binds to X-territories in presence of roX2.**

Representative Immunofluorescence pictures of *D.melanogaster* female cells transfected with MSL2<sup>vir</sup>-GFP construct (VIR) *-/+ roX2 virilis* (roX2vir) or *roX2 melanogaster* (roX2mel) genes. Cells were stained using antibodies against GFP, MSL3, H4K16ac and DAPI to visualize DNA. Scale bar: 3μM.
