# Supplementary material for: Divergent evolution toward sex chromosome-specific gene regulation in Drosophila
Source: PubMed Central journal article supplement — Genes Dev. 2021 Jul 1;35(13-14):1055–70. doi: 10.1101/gad.348411.121 (PMC8247607; doi:10.1101/gad.348411.121), 2021-07-01
Supplement: supp_gad.348411.121_Supplemental_Fig_S6.pdf [file supp_gad.348411.121_Supplemental_Fig_S6.pdf]

# Suppl. Fig. 6

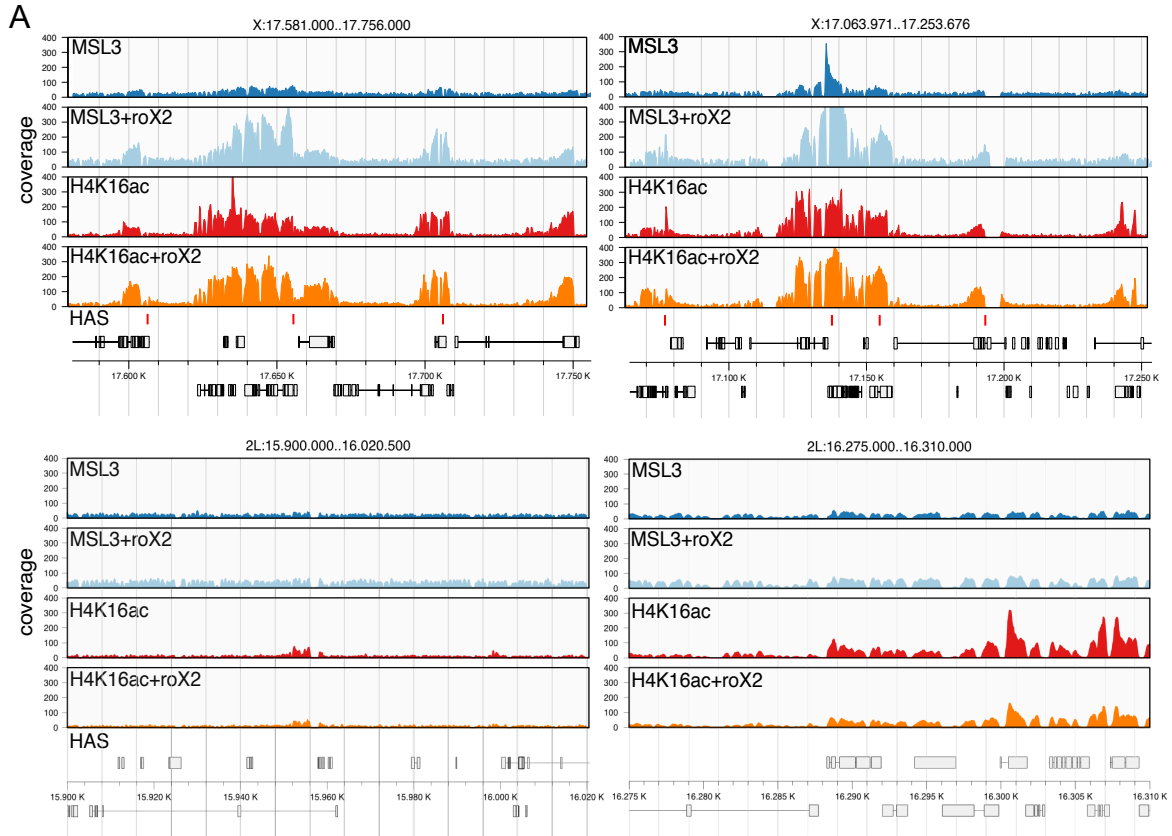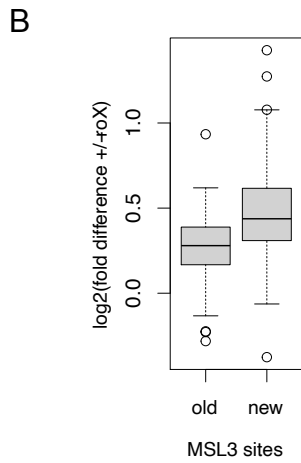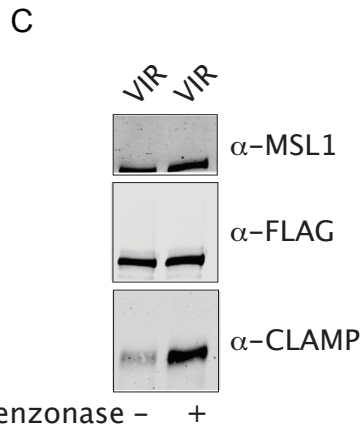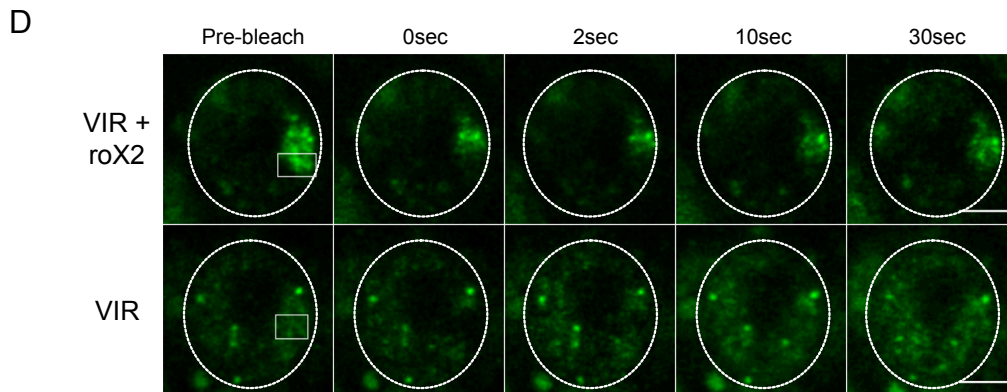

**Figure S6. The binding of MSL2<sup>vir</sup> to DNA is tighter in presence of roX2.**

- (A) Representative ChIP profiles (MSL3 and H4K16ac) of female *D. melanogaster* cells expressing MSL2<sup>vir</sup>-GFP  $-/+$  roX2 illustrating two regions of the X chromosome (top panels) with HAS constitutively bound by MSL2<sup>vir</sup> (left panel) or just bound in presence of roX2 (right panel) and two regions of the 2L chromosome (bottom panels). The MSL2<sup>mel</sup> *in vivo* binding sites (HAS) are indicated at the bottom.
- (B) Average signal changes measured in 4 independent H4K16ac ChIP experiments from *D. melanogaster* female cells expressing MSL2<sup>vir</sup>-GFP  $-/+$  roX2 at HAS non-bound (new, 115) or bound (old, 48) without roX.
- (C) Western-blot analyses of pull-down experiments using the recombinant MSL2<sup>vir</sup>-FLAG (VIR) construct as bait in presence of extracts from male *D. melanogaster* cells untreated or treated with Benzonase.
- (D) Examples of FRAP experiments. After pre-bleach scanning, a small portion of the MSL2<sup>vir</sup>-GFP (VIR) signal  $-/+$  roX2 was photobleached and followed by repeated scans at the indicated time. The bleached area is outlined by a white rectangle. Dotted circles indicate nuclei. Scale bar, 3 $\mu$ m.
